# Supplementary material
Source: ML conference proceedings conference paper supplement (https://www.ecva.net/papers/eccv_2020/papers_ECCV/html/123610511_ECCV_2020_paper.php)

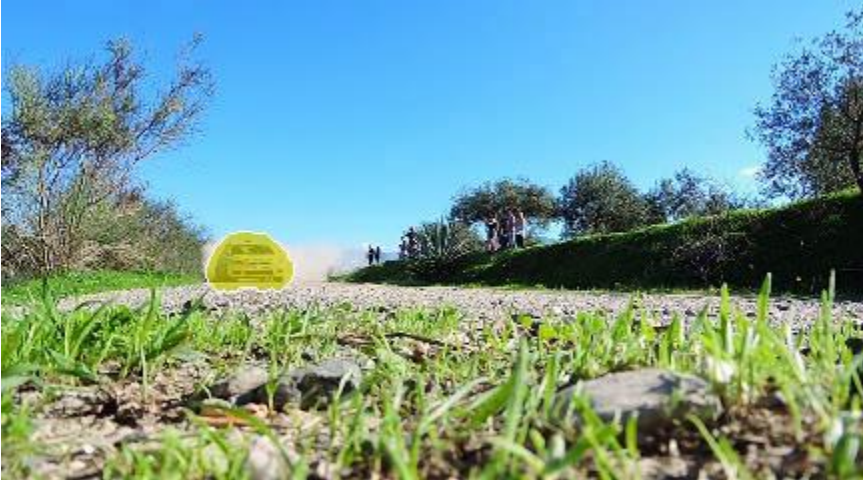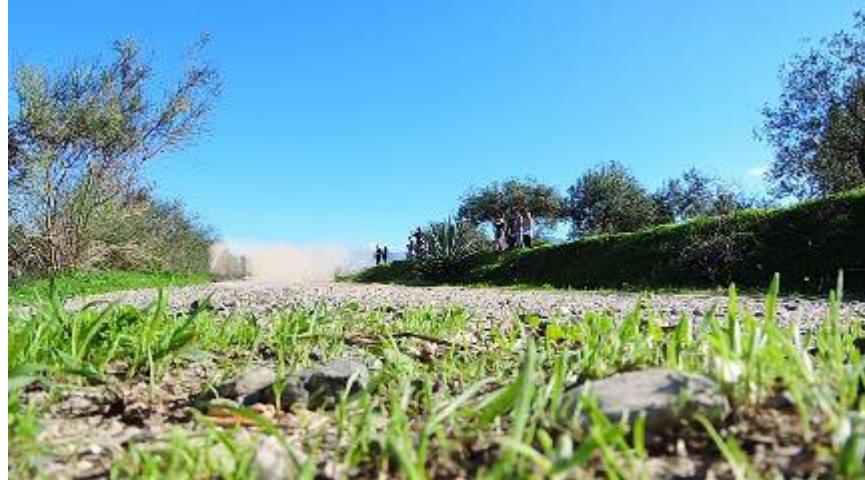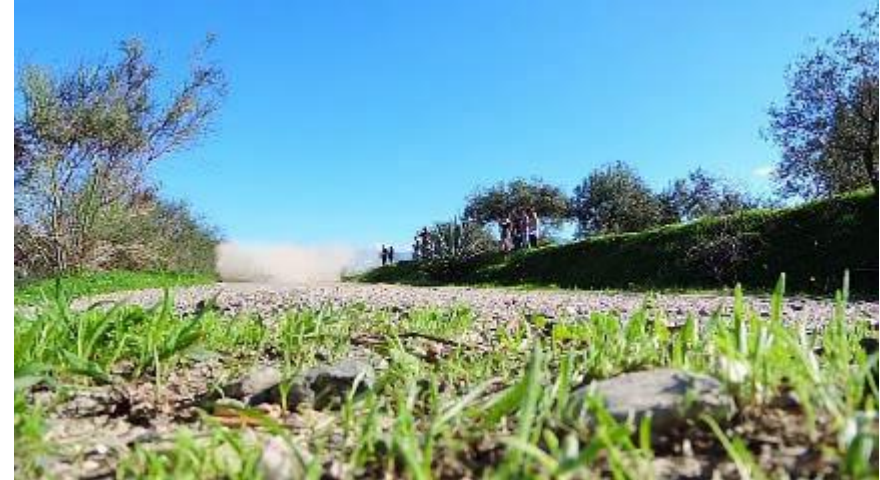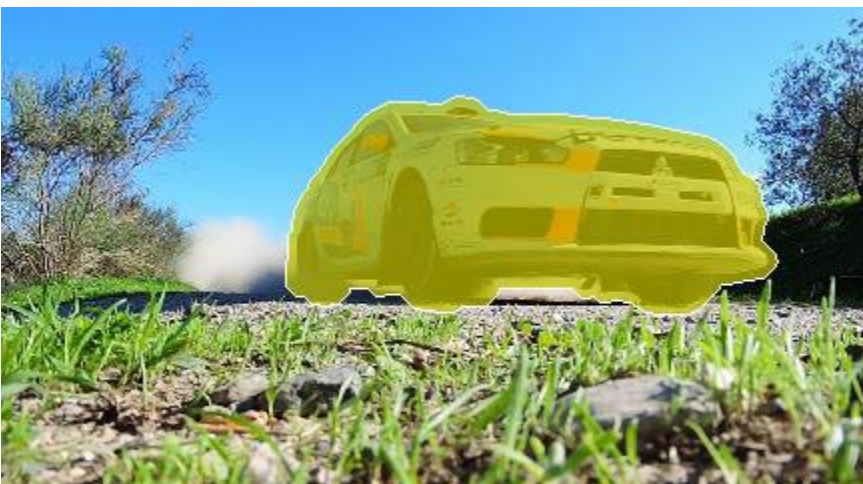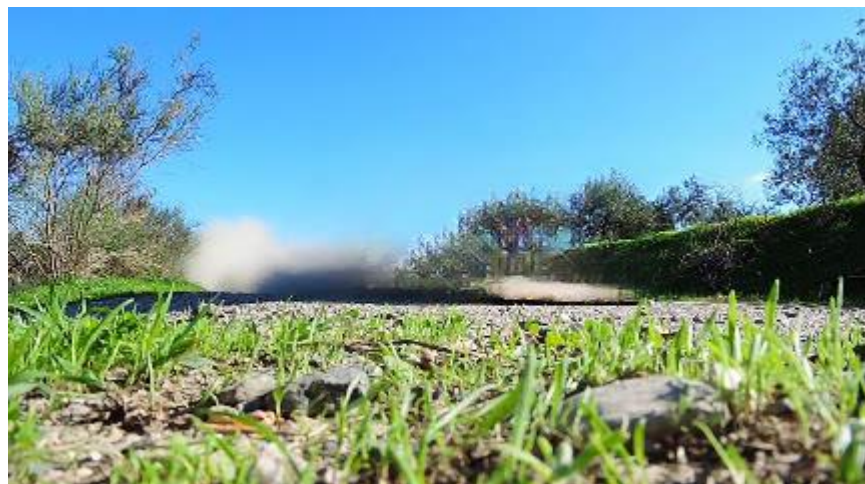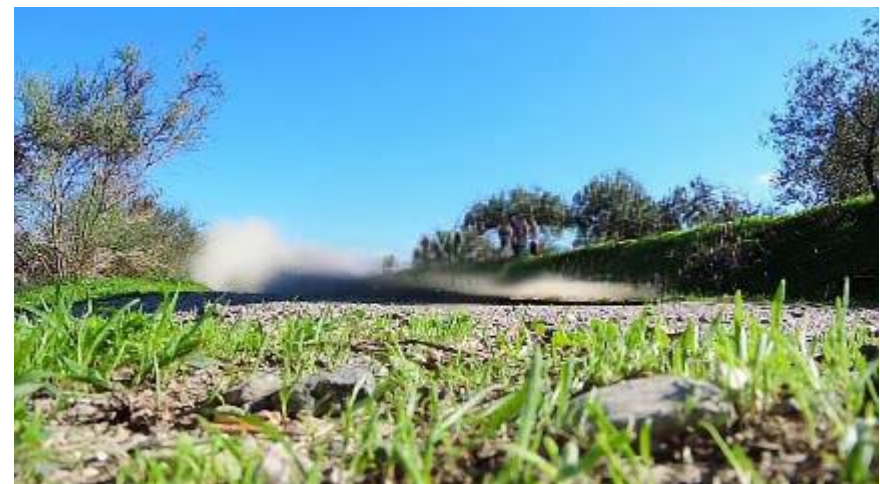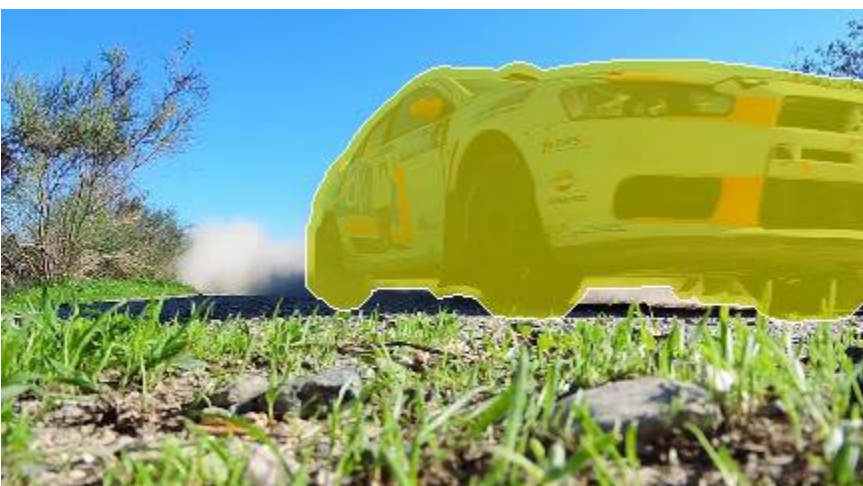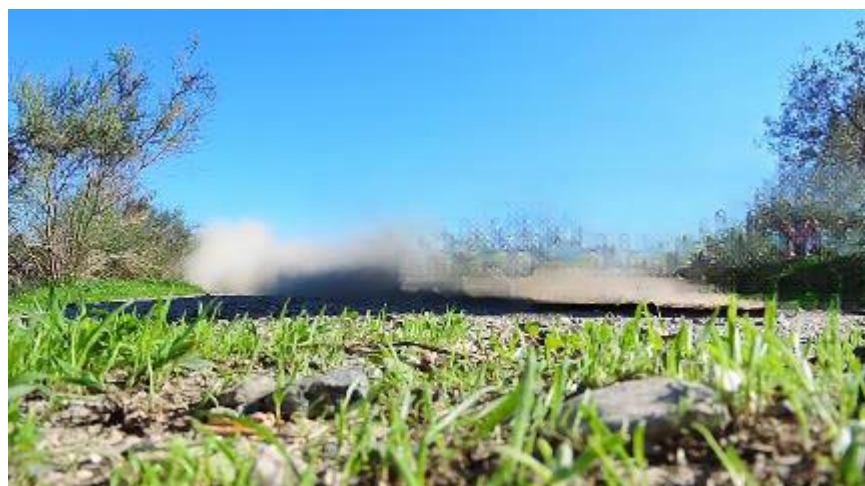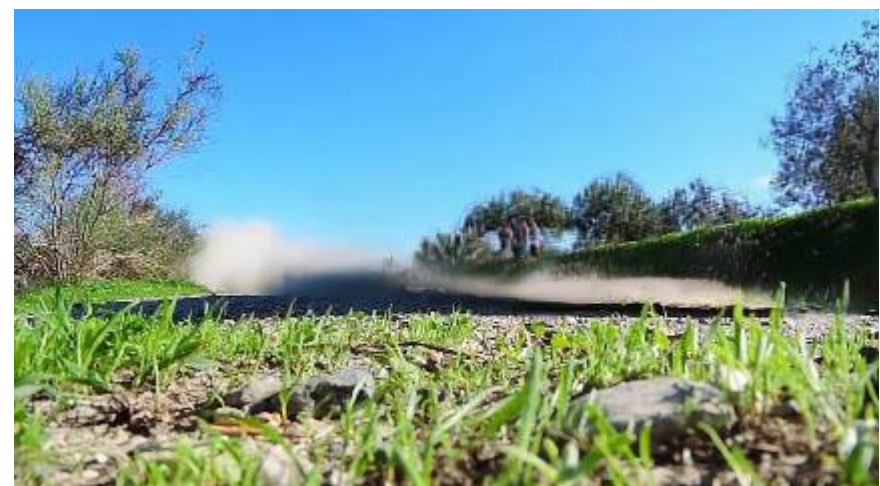

input frame

w/ perceptual and style losses

w/ T-PatchGAN loss

Supplement: Supplementary file 4 [file 123610511-supp.zip]
